# Supplementary material for: Thermo-processable covalent scaffolds with reticular hierarchical porosity and their high efficiency capture of carbon dioxide
Source: Royal Society of Chemistry journal article supplement (doi:10.1039/c5ta02938d), 2015-01-01
Supplement: c5ta02938d1.pdf [file c5ta02938d1.pdf]

## Supporting Information

### Thermo-processable covalent scaffolds with reticular hierarchical porosity and their high efficiency capture of carbon dioxide

Su-Young Moon,<sup>a‡</sup> Eunkyung Jeon,<sup>a‡</sup> Jae-Sung Bae,<sup>a</sup> Mi-Kyoung Park,<sup>b</sup> Chan Kim,<sup>c</sup> Do Young Noh,<sup>a c</sup> Eunji Lee<sup>b</sup> and Ji-Woong Park<sup>\*a</sup>

<sup>a</sup> School of Materials Science and Engineering, Gwangju Institute of Science and Technology, 123 Cheomdan-gwagiro, Buk-gu, Gwangju, 500-712, Korea

<sup>b</sup> Graduate School of Analytical Science and Technology, Chungnam National University, Daejeon, 305-764, Korea

<sup>c</sup> Department of Physics and Photon Science, Gwangju Institute of Science and Technology, 123 Cheomdan-gwagiro, Buk-gu, Gwangju, 500-712, Korea

E-mail: jiwoong@gist.ac.kr

#### TABLE OF CONTENTS

|                                                                          |     |
|--------------------------------------------------------------------------|-----|
| Experimental Section.....                                                | S2  |
| Fig. S1 FT-IR spectra.....                                               | S4  |
| Fig. S2 <sup>1</sup> H NMR spectrum.....                                 | S5  |
| Fig. S3 XPS spectra.....                                                 | S5  |
| Table S1. Assignment of the XPS data.....                                | S6  |
| Fig S4. PXRD data .....                                                  | S6  |
| Fig S5. Raman spectra.....                                               | S7  |
| Table S2. Elemental analysis (EA) .....                                  | S8  |
| Table S3. Summary of CO <sub>2</sub> adsorption in porous materials..... | S9  |
| Fig. S6 Pore size distribution of RUN.....                               | S10 |
| Fig. S7 The adsorption selectivity curves.....                           | S11 |
| Table S4. Summary of adsorption selectivities in porous materials.....   | S12 |
| Fig. S8 CO <sub>2</sub> heat of adsorption.....                          | S13 |
| Fig. S9 Initial slopes of single-gas adsorption isotherms.....           | S13 |
| Fig. S10 CO <sub>2</sub> adsorption isotherm.....                        | S14 |
| References.....                                                          | S15 |

## Experimental Section

**Materials:** All chemicals were purchased from Sigma-Aldrich. N,N-dimethylformamide (DMF) (anhydrous, 99.8%) was used without further purification. Hexamethylene diisocyanate (HDI) (98%) was distilled under reduced pressure. CO<sub>2</sub>, N<sub>2</sub> and gas mixtures (CO<sub>2</sub>/N<sub>2</sub>=15/85, CO<sub>2</sub>/N<sub>2</sub>=0.2/99.8, and CO<sub>2</sub>/CH<sub>4</sub>=10/90 in %) were used as received (purity 99.999%) from Sinil Gas.

**Characterization:** Gas adsorption isotherms were recorded on an ASAP 2020 volumetric adsorption apparatus (Micromeritics) at 77 K and 298 K for nitrogen and 273 K and 298 K for carbon dioxide. Prior to analysis, the samples were degassed in the degas port of the adsorption analyzer at 473 K for at least 12 hours. The surface area, heat of adsorption, pore volume, and pore size distribution were analyzed using ASAP 2020 v3.00 software (Micromeritics).

Scanning electron microscopy (SEM) images were collected on a Hitachi S-4700. Before taking SEM measurements, samples were coated with ultrathin platinum by vacuum sputtering. Transmission electron microscopy (TEM) was carried out using a model JEM-2100 of JEOL. The samples used for TEM were embedded in epoxy resin and then sliced using a PowerTome-XL microtome to about 60-nm-thick sections. The sliced samples were placed onto a copper grid and stained with RuO<sub>4</sub> for 30 min.

<sup>1</sup>H NMR spectra were recorded on a JEOL JNM-LA 400 WB FT-NMR in CDCl<sub>3</sub>, and DMF-d<sub>7</sub> as solvents. Solid-state <sup>13</sup>C NMR data were acquired using an AVANCE 400 WB Bruker with a resonance frequency of 400 MHz and spin frequency of 7 KHz. Fourier transform infrared (FTIR) spectroscopy was carried out on a Perkin-Elmer 2000 Series instrument. Powder samples for FTIR were prepared using pellets in KBr.

Thermogravimetric analysis (TGA) of the samples was carried out using a TA Instruments 2100 series analyzer in the range of 20 ~ 800°C at a heating rate of 10 °C/min under nitrogen.

X-ray photoelectron spectroscopy (XPS) was performed at a 90° take-off angle with a Multilab 2000 (Thermo Electron Corporation) spectrometer using MgKα radiation (1253.6 eV) as the X-ray source, in an ultrahigh vacuum condition. The analyzed core level lines (C1s, O1s, N1s) were calibrated with respect to the C1s binding energy conventionally set here at 285 eV.

Adsorption-desorption cycles of CO<sub>2</sub> or a mixture of gases on RUNs were measured using a thermogravimetric analyzer (TA Instruments 2100 series). For the pure CO<sub>2</sub> and mixed gas (15 % or 0.2 % CO<sub>2</sub>/N<sub>2</sub>) recycling tests, the sample was activated under a N<sub>2</sub> stream at a flow rate of 20 mL/min at 100 °C for 30 min. After activation, the gas was then switched from N<sub>2</sub> to pure CO<sub>2</sub> (20 mL/min) or mixed gas (20 mL/min) and the change in weight of the sample with time was recorded at 25 °C. Once the sample was saturated with the adsorbed gas (i.e., CO<sub>2</sub> or mixed gas), the gas in the stream was switched back from pure CO<sub>2</sub> or mixed gas to N<sub>2</sub> (20 mL/min) and the temperature was increased to the target temperature at a heating rate of 10 °C/min. The sample was cooled to 25 °C under N<sub>2</sub> (20 mL/min), and the gas in the stream was again switched back to CO<sub>2</sub> or mixed gas for the next absorption run. This adsorption–desorption cycle was repeated several times.

Raman spectra were obtained from Renishaw InVia Raman Microscope with an excitation wavelength of 514 nm.

Elemental analysis were carried out using Thermofinnigan EA1112. Each sample was measured after drying at 100 °C for 3 hours.

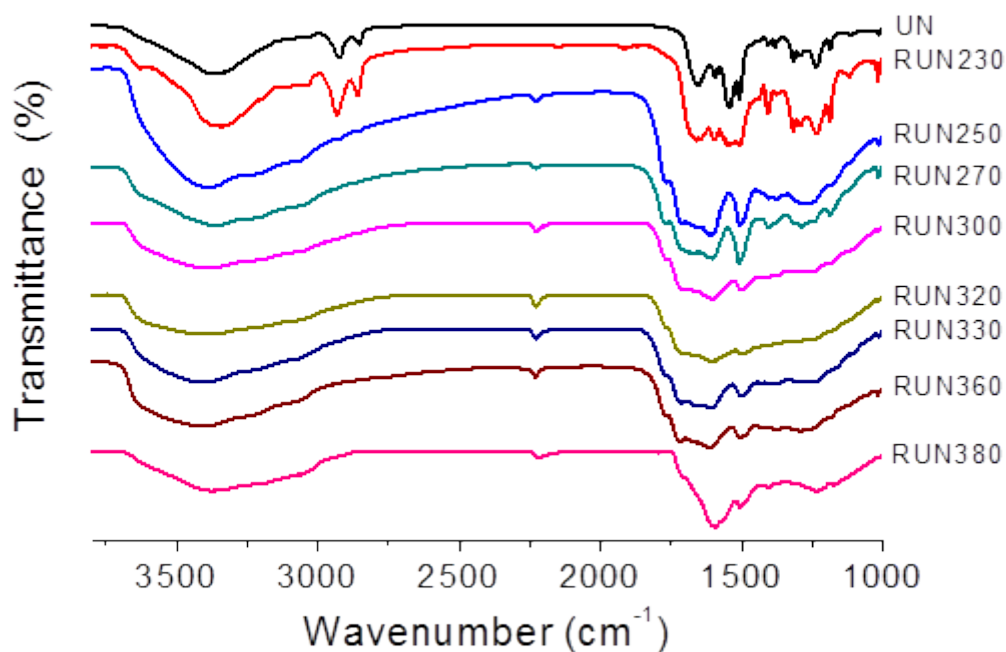

**Fig. S1** FT-IR spectra of UN and RUNs treated at different  $T_r$  values: 230 °C, 250 °C, 270 °C, 300 °C, 320 °C, 330 °C, 360 °C, and 380 °C. All samples were pelletized in KBr for FT-IR. The absorption bands at 3335  $\text{cm}^{-1}$ , 1655  $\text{cm}^{-1}$ , 1542  $\text{cm}^{-1}$ , and 1316  $\text{cm}^{-1}$  were due to N-H stretching, C=O stretching, N-H bending, and C-N stretching vibrations of hydrogen-bonded urea, respectively.(2) The bands at 2930-2860  $\text{cm}^{-1}$  and 3150-3050  $\text{cm}^{-1}$  correspond to the aliphatic and aromatic C-H stretching vibrations, respectively. The bands at 1594  $\text{cm}^{-1}$ , 1508  $\text{cm}^{-1}$ , and 1406  $\text{cm}^{-1}$  were due to C=C stretching vibrations in the aromatic ring. The peaks at 2260  $\text{cm}^{-1}$ , 2155  $\text{cm}^{-1}$  and 2230  $\text{cm}^{-1}$  are attributed to the isocyanate N=C=O stretching, carbodiimide N=C=N stretching, and cyanamide C $\equiv$ N stretching vibrations, respectively, which were generated during thermal dissociation and rearrangement of urea bonds.(3) The C=O stretching vibration of uretidinedione (isocyanate dimer) appeared at 1768  $\text{cm}^{-1}$  and the absorption at 1711  $\text{cm}^{-1}$  is attributed to the stretching vibration of isocyanurate C=O.(4)

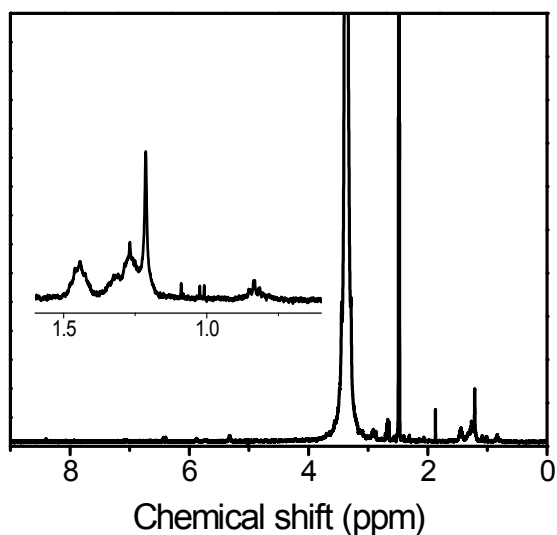

**Fig. S2**  $^1\text{H}$  NMR spectrum of condensates collected during thermal treatment of UN at 230  $^{\circ}\text{C}$  for 8 h under nitrogen flow.

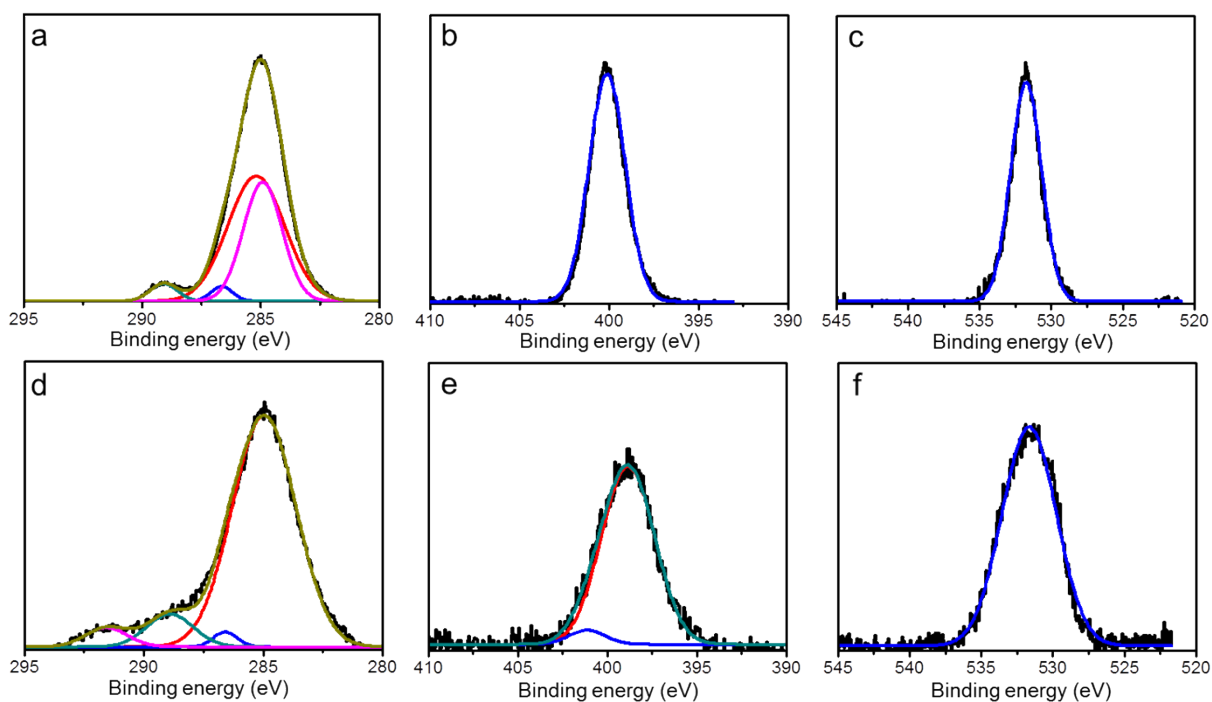

**Fig. S3** XPS spectra of UN and RUN380. **a-c**, C1s, N1s, and O1s of UN, respectively. **d-f**, C1s, N1s, and O1s of RUN380, respectively. The peak assignments are given in **Table S1**.

**Table S1.** Assignment of the XPS data for UN and RUN380 in a to f in Figure S3.

|            | Binding energy (eV) of UN |                | Binding Energy (eV) of RUN380 |                                            |
|------------|---------------------------|----------------|-------------------------------|--------------------------------------------|
| <b>C1s</b> | a                         | 284.9 C=C/C-H  | d                             | 284.98 C-C/C-H                             |
|            |                           | 285.2 C-C/C-H  |                               | 282.23                                     |
|            |                           | 286.7 C-N      |                               | 288.01 N-CN                                |
|            |                           | 289.1 O=C-N    |                               | 291.46 ( $\pi \rightarrow \pi^*$ shake-up) |
| <b>N1s</b> | b                         | 400.1 NHC=O    | e                             | 398.9 Isocyanurate                         |
|            |                           |                |                               | 401.2 (RNH) <sub>2</sub> C=O, (R=phenyl)   |
| <b>O1s</b> | c                         | 531.8 urea C=O | f                             | 531.7 Urea/Isocyanurate C=O                |

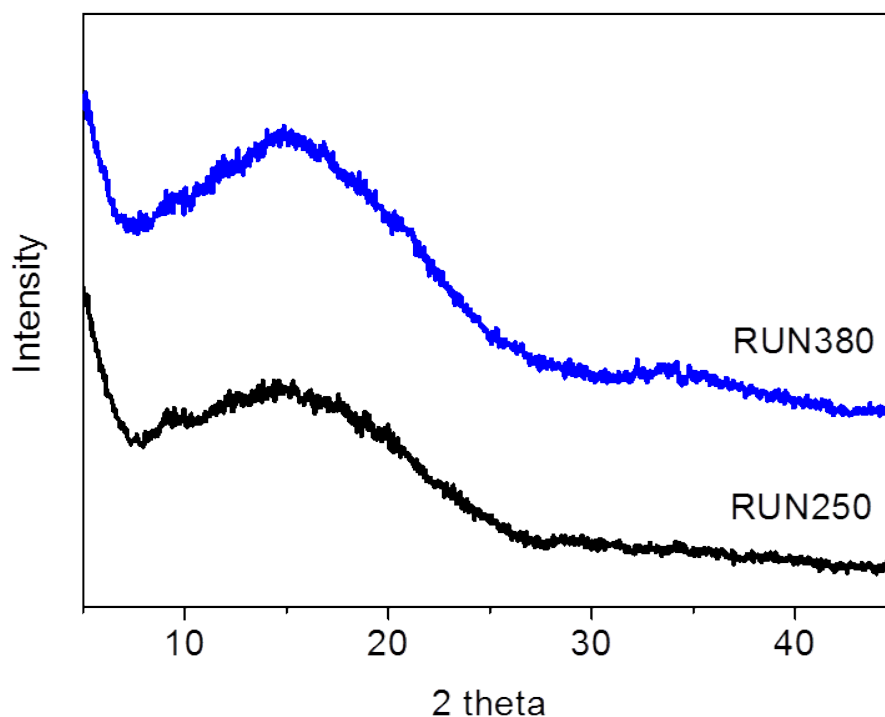

**Fig. S4** PXRD data indicating amorphous network structure for RUN250 and RUN380. The x-ray powder diffraction measurement was performed at the 5D GIST NCRC-CELA beamline of the Pohang Light Source- II (PLS- II ) in Korea. The x-ray wavelength  $\lambda$  (x-ray energy) was fixed to 1.24 Å (10 keV) by a double-bounce Si (111) monochromator. The diffracted x-rays from specimen were measured by a scintillation point detector.

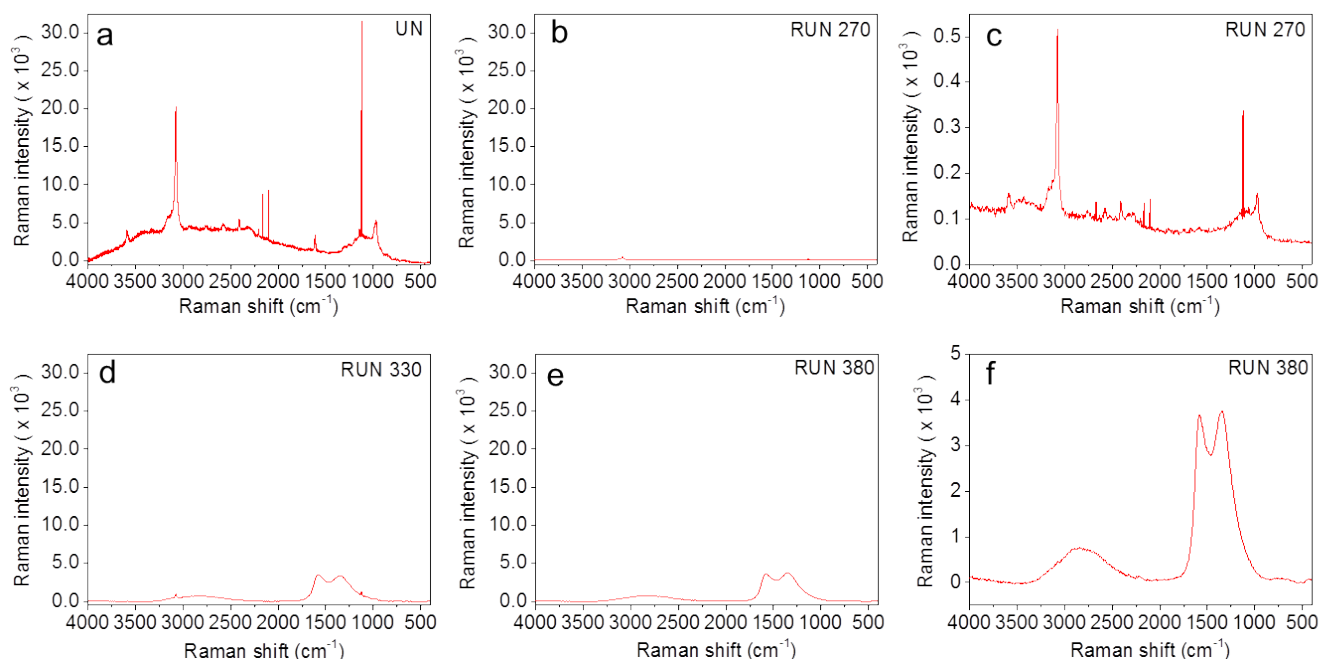

**Fig. S5** Raman spectra of UN and RUN. Raman spectra for **a**, UN and **b-c**, RUN270 exhibits N-H stretching, aromatic C-H stretching, C=O stretching, N-C-N stretching vibrations and aromatic ring breathing motion at 3587  $\text{cm}^{-1}$ , 3076  $\text{cm}^{-1}$ , 1600  $\text{cm}^{-1}$ , 967  $\text{cm}^{-1}$  and 1122  $\text{cm}^{-1}$ , respectively. **d**, RUN330 exhibits aromatic C-H stretching, N-C-N stretching vibrations and aromatic ring breathing motion at 3076  $\text{cm}^{-1}$ , 967  $\text{cm}^{-1}$  and 1122  $\text{cm}^{-1}$ , respectively. The peaks at 1344  $\text{cm}^{-1}$  and 1585  $\text{cm}^{-1}$  correspond to D and G-band of partially carbonized UN, respectively.  $I_D/I_G$  ratio of RUN330 is 0.96. **d-f**, RUN380 exhibits a peak of cyanamide  $\text{C}\equiv\text{N}$  stretching vibrations at 2220  $\text{cm}^{-1}$  as well as broad D and G peaks. The broad peak around 2834  $\text{cm}^{-1}$  indicates the presence of significant structural defects of carbon.  $I_D/I_G$  ratio of RUN380 is 1.02. **c** and **f**, Magnified Raman spectra for RUN270 and RUN380, respectively.

**Table S2.** Elemental analysis data for UN and RUN.

| <b>Sample/Element</b> | <b>N (%)</b> | <b>C (%)</b> | <b>H (%)</b> | <b>O (%)</b> | <b>C/O</b> | <b>C/N</b> | <b>N/O</b> |
|-----------------------|--------------|--------------|--------------|--------------|------------|------------|------------|
| <b>UN (Theo.)</b>     | 15.6         | 68.7         | 6.8          | 8.9          | 7.7        | 4.4        | 1.7        |
| <b>RUN (Theo.)</b>    | 11.6         | 71.9         | 3.3          | 13.2         | 5.5        | 6.2        | 0.90       |
| <b>UN</b>             | 15.7         | 67.3         | 6.8          | 10.2         | 6.6        | 4.3        | 1.5        |
| <b>RUN270</b>         | 12.5         | 66.9         | 3.4          | 17.2         | 3.9        | 5.4        | 0.73       |
| <b>RUN330</b>         | 14.2         | 68.1         | 3.2          | 14.5         | 4.7        | 4.8        | 0.98       |
| <b>RUN380</b>         | 14.5         | 65.8         | 3.0          | 16.1         | 4.1        | 4.5        | 0.90       |

Theoretical EA data for RUN was obtained by assuming that the RUN consist entirely of the isocyanurate network formed via cyclization of tetrakis(4-isocyanatophenyl)methane. EA data for RUN 270, 330, and 380 show that they became enriched with nitrogen and oxygen as compared with RUN(Theo).

**Table S3.** Summary of CO<sub>2</sub> adsorption at 273K in porous materials.

| <b>Frameworks</b>  | <b>BET surface area<br/>(m<sup>2</sup>/g)</b> | <b>CO<sub>2</sub> adsorption<br/>(mmol/g)</b> | <b>Ref.</b> |
|--------------------|-----------------------------------------------|-----------------------------------------------|-------------|
| <b>RUN380</b>      | 408                                           | 3.6                                           | This work   |
| <b>COF-1</b>       | 750                                           | 2.32                                          | 6, 9        |
| <b>COF-5</b>       | 1670                                          | 1.34                                          | 6, 9        |
| <b>COF-6</b>       | 750                                           | 3.84                                          | 6, 9        |
| <b>COF-8</b>       | 1350                                          | 1.43                                          | 6, 9        |
| <b>COF-10</b>      | 1760                                          | 1.21                                          | 6, 9        |
| <b>COF-102</b>     | 3620                                          | 1.56                                          | 6, 9        |
| <b>COF-103</b>     | 3530                                          | 1.70                                          | 6, 9        |
| <b>POF-C-1000</b>  | 785                                           | 3.54                                          | 7           |
| <b>POF-C-800</b>   | 335                                           | 3.24                                          | 7           |
| <b>POF-DC-1000</b> | 100                                           | 2.07                                          | 7           |
| <b>POF (PAF-6)</b> | 177                                           | 1.81                                          | 7           |
| <b>PAF-1</b>       | 5600                                          | 2.05                                          | 8, 9        |
| <b>PAF-3</b>       | 2932                                          | 3.48                                          | 8, 9        |
| <b>PAF-4</b>       | 2246                                          | 2.41                                          | 8, 9        |

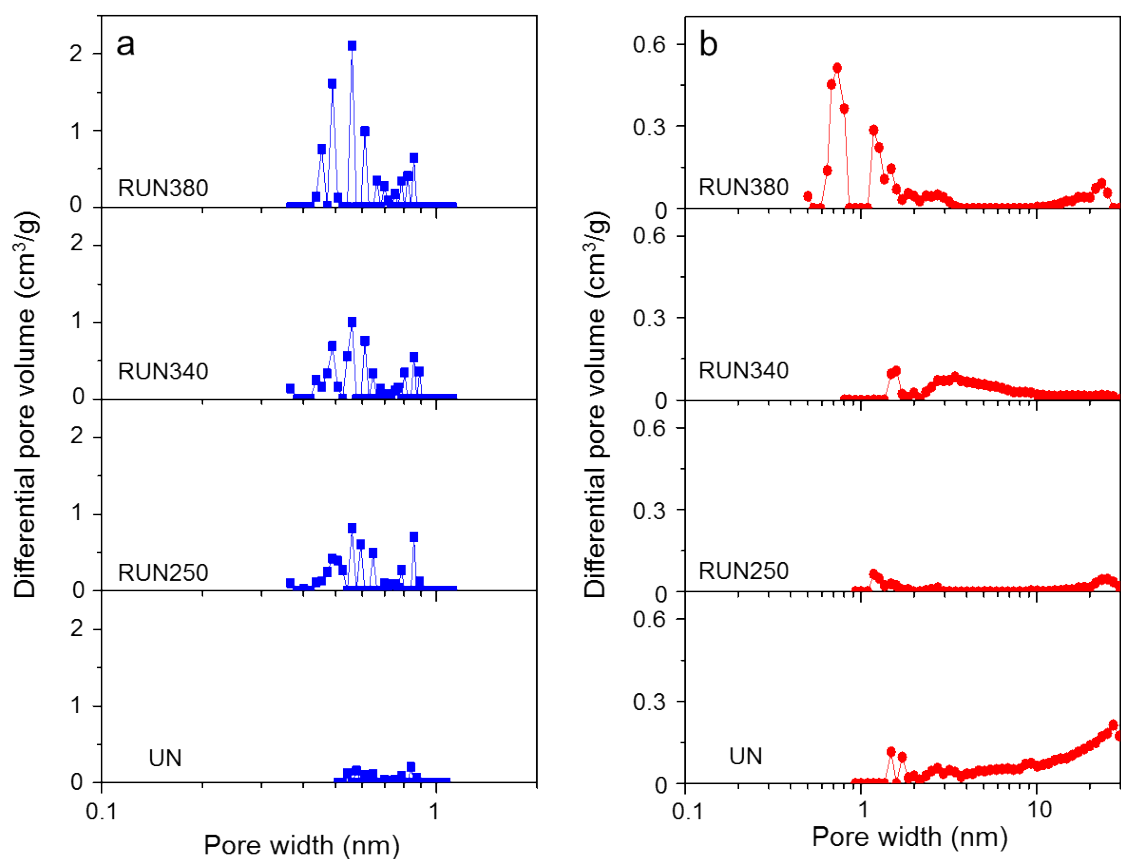

**Fig. S6** Pore-size distribution derived from adsorption data of **a**, CO<sub>2</sub> and **b**, N<sub>2</sub> for the UN and RUNs.

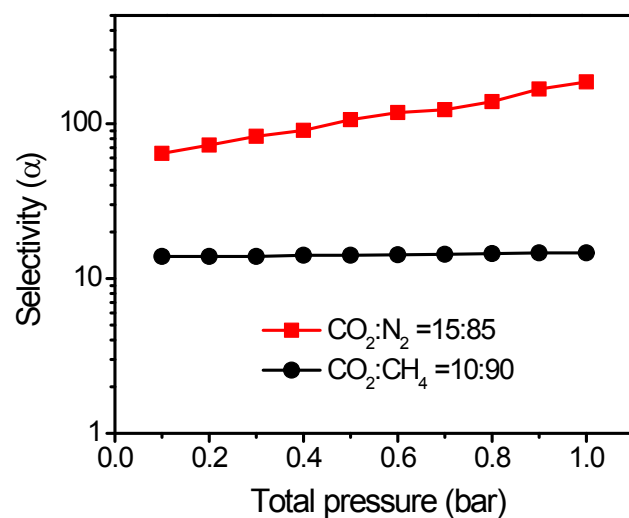

**Fig. S7** The adsorption selectivity curves estimated according to the ideal adsorbed solution theory (IAST) for RUN380.(5) The single gas isotherms were fitted using the Langmuir model. The adsorption selectivities for binary mixtures were calculated using the Ideal Adsorption Solution Theory (IAST) of Myers and Prausnitz. The IAST calculations were carried out for binary mixture containing 15% CO<sub>2</sub> in N<sub>2</sub> and 10% CO<sub>2</sub> in CH<sub>4</sub> which are similar compositions with flue gas and natural gas, respectively. The adsorption selectivities of RUN380 for CO<sub>2</sub> relative to CH<sub>4</sub> and relative to N<sub>2</sub> were, respectively,  $\alpha_{\text{CO}_2/\text{CH}_4}=15$  and  $\alpha_{\text{CO}_2/\text{N}_2}=186$ , at 298K and 1 bar.

**Table S4.** Summary of adsorption selectivities for 15/85 CO<sub>2</sub>/N<sub>2</sub> mixture at 1bar and 296K using the ideal adsorbed solution theory (IAST). (10)

| <b>Frameworks</b>                     | <b>CO<sub>2</sub> uptake capacity<br/>(mmol/g)</b> | <b>N<sub>2</sub> uptake capacity<br/>(mmol/g)</b> | <b>Selectivity</b> |
|---------------------------------------|----------------------------------------------------|---------------------------------------------------|--------------------|
| <b>RUN380<br/>(This work at 298K)</b> | 2.17                                               | 0.02                                              | 186                |
| <b>MgMOF-74</b>                       | 6.20                                               | 0.193                                             | 182.1              |
| <b>UTSA-16</b>                        | 2.37                                               | 0.043                                             | 314.7              |
| <b>NaX zeolite</b>                    | 2.72                                               | 0.106                                             | 145.9              |
| <b>Cu-SSZ13</b>                       | 1.78                                               | 0.150                                             | 67.4               |
| <b>H-SSZ13</b>                        | 1.74                                               | 0.138                                             | 71.3               |
| <b>JBW</b>                            | 1.42                                               | 0.015                                             | 524.4              |
| <b>mmenCuBTTri</b>                    | 2.22                                               | 0.038                                             | 329.0              |
| <b>ZnMOF-74</b>                       | 1.67                                               | 0.108                                             | 87.7               |
| <b>Bio-MOF-11</b>                     | 1.28                                               | 0.092                                             | 79.5               |
| <b>Cu-TDPAT</b>                       | 1.82                                               | 0.179                                             | 57.8               |
| <b>ZIF-78</b>                         | 0.76                                               | 0.1                                               | 41.4               |
| <b>MFI</b>                            | 0.26                                               | 0.134                                             | 11.2               |
| <b>MOF-177</b>                        | 0.16                                               | 0.245                                             | 3.6                |

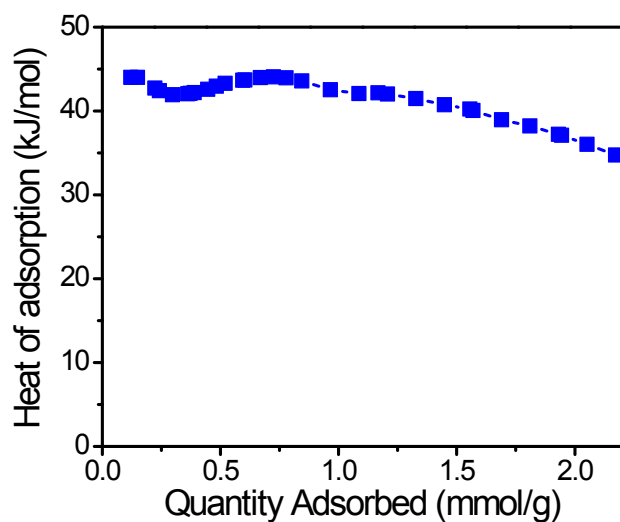

**Fig. S8** CO<sub>2</sub> heat of adsorption,  $Q_{st}$  of RUN380, estimated from low-pressure isotherms at 273 and 298 K by applying the Clausius-Clapeyron equation.

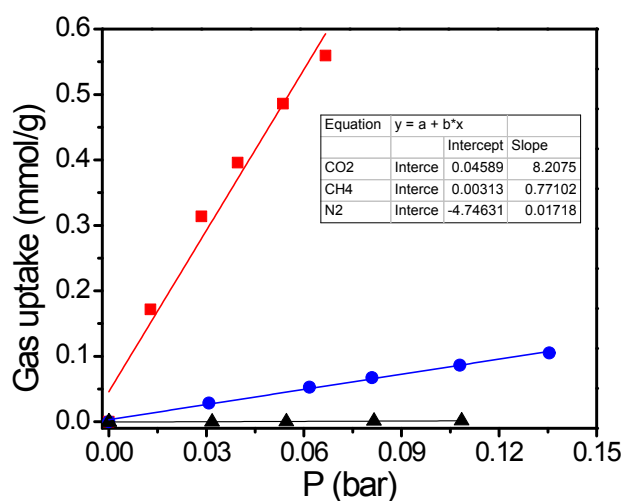

**Fig. S9** Initial slopes of single-gas adsorption isotherms. Adsorption selectivities of RUN380 for CO<sub>2</sub> (red square) relative to N<sub>2</sub> (black triangle) and relative to CH<sub>4</sub> (blue circle) at 298 K were calculated from these slopes.

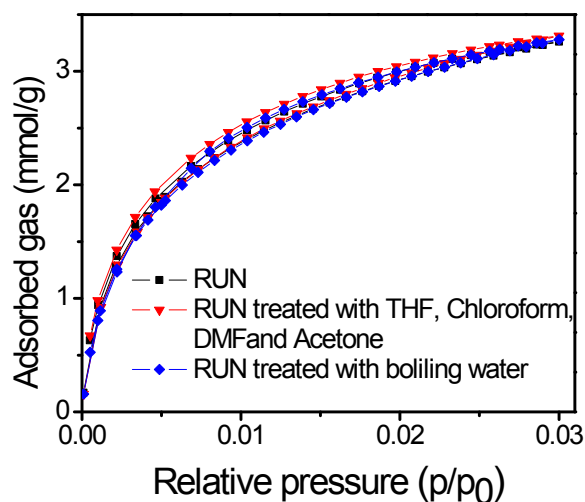

**Fig. S10** CO<sub>2</sub> adsorption isotherms of an as-prepared RUN380 sample, that treated in boiling water, and that treated sequentially in boiling water, chloroform, DMF, and acetone. The stability of the RUN to water was investigated by having it refluxed in water for 3 days. After RUN were filtered and dried at 150 °C, its CO<sub>2</sub> adsorption isotherm was measured at 273 K and compared with that of the original RUN sample. The results showed that there was negligible change. We also checked it for solvent resistance. RUNs were soaked sequentially in THF, chloroform, DMF and acetone for 1 day, respectively, and then filtered and dried at 150 °C. There was negligible change in the measured CO<sub>2</sub> adsorption curves after solvent treatment.

## References

- (1) S.-Y. Moon, E. Jeon, J.-S. Bae, M. Byeon, J.-W. Park, *Polym. Chem.* 2014, **5**, 1124-1131.
- (2) J. Mattia, P. Painter, *Macromolecules* 2007, **40**, 1546-1554.
- (3) H. G. Khorana, *Chem. Rev.* 1953, **53**, 145-166.
- (4) L. Stradella, M. Argentero, *Thermochimica Acta*, 1995, **268**, 1-7.
- (5) A. L. Myers, J. M. Prausnitz, *AIChE. J.* 1965, **11**, 121-127.
- (6) H. Furukawa and O. M. Yaghi, *J. Am. Chem. Soc.*, 2009, **131**, 8875-8883.
- (7) P. Pachfule, V. M. Dhavale, S. Kandambeth, S. Kurungot and R. Banerjee, *Chem. Eur. J.*, 2013, **19**, 974-980.
- (8) T. Ben, C. Pei, D. Zhang, J. Xu, F. Deng, X. Jing and S. Qiu, *Energ. Environ. Sci.*, 2011, **4**, 3991-3999.
- (9) R. Dawson, E. Stockel, J. R. Holst, D. J. Adams and A. I. Cooper, *Energ. Environ. Sci.*, 2011, **4**, 4239-4245.
- (10) S. Xiang, Y. He, Z. Zhang, H. Wu, W. Zhou, R. Krishna and B. Chen, *Nat Commun*, 2012, **3**, 954.
